# Supplementary material
Source: publisher figshare collection journal article supplement (https://acs.figshare.com/ndownloader/files/4949101)
Supplement: Supplementary file 1 [file 4949101]

## Supporting Information

# Influence of Corona Structure on Binding of an Ionic Surfactant in Oppositely Charged Amphiphilic Polyelectrolyte Micelles

Foteini Delisavva<sup>1</sup>, Juraj Škvarla<sup>1</sup>, Edyta Woźniak<sup>1,2</sup>, Mariusz Uchman<sup>1</sup>, Ewa Pavlova<sup>3</sup>,  
Miroslav Šlouf<sup>3</sup>, Vasyly M. Garamus<sup>4</sup>, Karel Procházka<sup>1</sup> and Miroslav Štěpánek<sup>1,\*</sup>

<sup>1</sup>*Department of Physical and Macromolecular Chemistry, Faculty of Science  
Charles University in Prague, Hlavova 2030, 12840 Prague 2, Czech Republic*

<sup>2</sup>*Department of Chemistry, The Faculty of Food Science, Wrocław University of  
Environmental and Life Sciences, 50-375 Wrocław, C. K. Norwida 25, Poland*

<sup>3</sup>*Institute of Macromolecular Chemistry, Academy of Sciences of the Czech Republic,  
Heyrovský Sq. 2, 16206 Prague 6, Czech Republic*

<sup>4</sup>*Helmholtz-Zentrum Geesthacht, Centre for Materials and Coastal Research, D-21502  
Geesthacht, Germany*

## The evaluation of the SAXS curve

The SAXS curve was fitted using the SASfit 0.93.3 software.<sup>1</sup> The following model was used for the fitting:

$$I(q) = NS(q)I_{\text{mic}}(q) + \frac{I_{\text{fluct}}}{1 + \xi^2 q^2} \quad (1)$$

where  $I_{\text{fluct}}$  is the forward scattering intensity and  $\xi$  is the correlation length for the short range fluctuations,  $N$  is the number of the micelles in the unit volume  $I_{\text{mic}}(q)$  is the scattering function of the single micelle and  $S(q)$  is the structure factor of the micellar solution.

The scattering from the micelle is approximated by the form factor of homogeneous spherical shell with the Gaussian distribution of the core radii:

$$I_{\text{mic}}(q) = \int_0^\infty \sqrt{\frac{\pi}{2}} \sigma \left[ 1 + \operatorname{erf}\left(\frac{R}{\sqrt{2}\sigma}\right) \right]^{-1} e^{-\frac{(R-R_0)^2}{2\sigma^2}} [F(q, R + \Delta R, \Delta\eta_2) - F(q, R, \Delta\eta_2 - \Delta\eta_1)]^2 dR \quad (2)$$

Here  $R_0$  is the mean core radius and  $\sigma$  is the FWHM of the distribution,  $\Delta R$  is the shell thickness,  $\Delta\eta_1$  and  $\Delta\eta_2$ , respectively, are the excess scattering length densities for the core and the shell, and the  $F(q, R, \Delta\eta)$  function is given by the relationship:

$$F(q, R, \Delta\eta) = 4\pi R^3 \Delta\eta \frac{\sin(qR) - qr \cos(qR)}{q^3 R^3} \quad (3)$$

The structure factor of the micelles was approximated as the structure factor of hard spheres,

$$S(q) = \left[ 1 + 12\varphi \frac{G(\varphi, r)}{qr} \right]^{-1} \quad (4)$$

where  $r$  is the interaction radius,  $\varphi$  is the volume fraction of the spheres and the  $G(\varphi, r)$  function has the form

$$\begin{aligned} G(\varphi, r) = & \left[ \frac{1+2\varphi}{(1-\varphi)^2} \right]^2 \frac{\sin(2qr) - 2qr \cos(2qr)}{(2qr)^2} - \\ & - 6\varphi \left[ \frac{1+\varphi/2}{(1-\varphi)^2} \right]^2 \frac{2qr + (2-4q^2 R^2) \cos(2qr) - 2}{(2qr)^3} + \\ & + \frac{\varphi}{2} \left[ \frac{1+2\varphi}{(1-\varphi)^2} \right]^2 \frac{4[(12q^2 r^2 - 6) \cos(2qr) + (8q^3 r^3 - 12qr) \sin(2qr) + 6] - (2qr)^4 \cos(2qr)}{(2qr)^5} \end{aligned} \quad (5)$$

(1) Software package SASfit for fitting small-angle scattering curves.

<https://kur.web.psi.ch/sans1/SANSSoft/sasfit.html>
